# Supplementary material
Source: bioRxiv or medRxiv preprint supplement (https://medrxiv.org/highwire/filestream/87972/field_highwire_adjunct_files/0/2020.06.30.20142570-1.pdf)
Supplement: Supplementary file [file 2020.06.30.20142570-1.pdf]

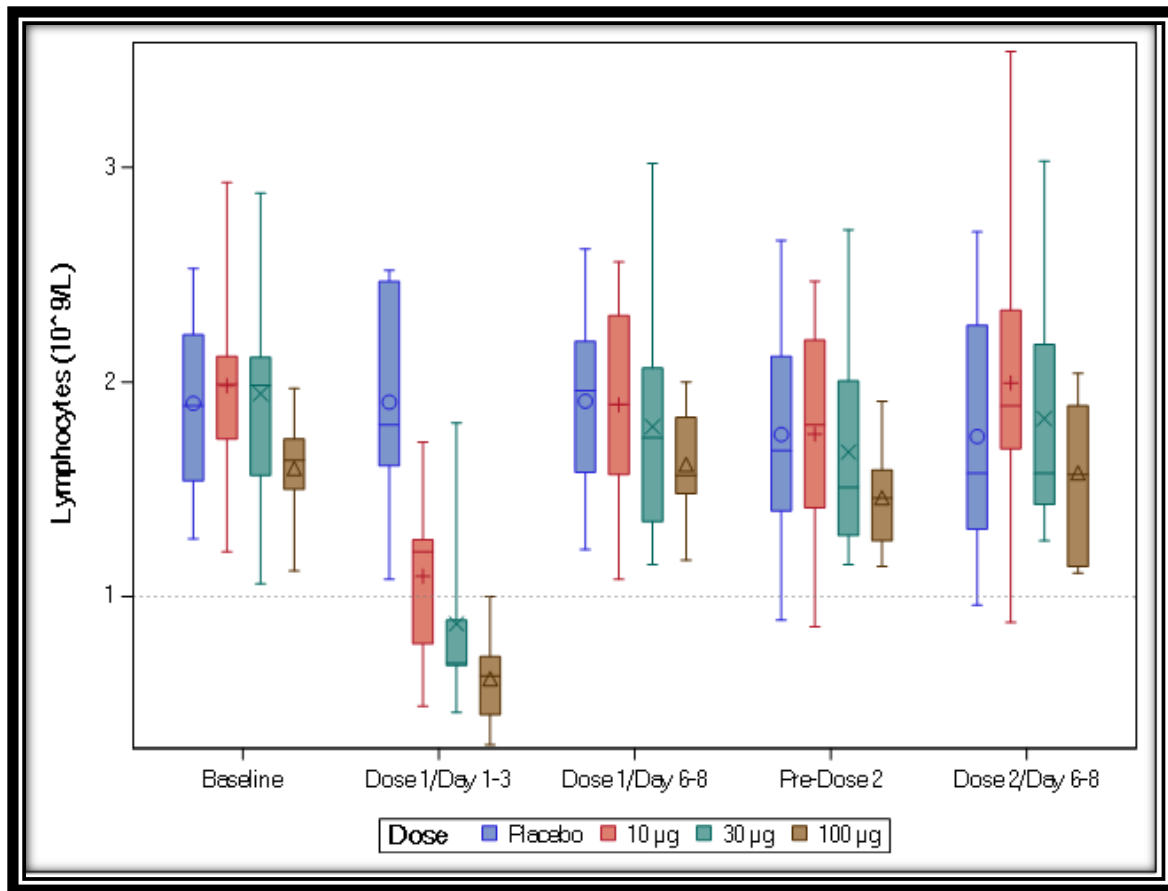

**Extended Data Figure 1 | Post Vaccination Changes in Lymphocyte Count Over Time.** Figure represents box-and-whisker plots for observed values at the following timepoints: Dose 1/Day 1-3: ~1 day after Dose 1; Dose 2/Day 6-8: ~7 days after Dose 1; Pre-Dose 2: before Dose 2; Dose 2/Day 6-8: ~7 days after Dose 2. Symbols denote group means – O: placebo; +: 10 µg; X: 30 µg; Δ: 100 µg. Center line of box denotes median; lower and upper edges denote first and third quartiles; lower and upper whiskers denote minimum and maximum.

|                                   | <b>10 µg<br/>(N=12)<br/>n (%)</b> | <b>30 µg<br/>(N=12)<br/>n (%)</b> | <b>100 µg<br/>(N=12)<br/>n (%)</b> | <b>Placebo<br/>(N=9)<br/>n (%)</b> | <b>Total<br/>(N=45)<br/>n (%)</b> |
|-----------------------------------|-----------------------------------|-----------------------------------|------------------------------------|------------------------------------|-----------------------------------|
| <b>Sex</b>                        |                                   |                                   |                                    |                                    |                                   |
| <b>Male</b>                       | 7 (58.3)                          | 6 (50.0)                          | 5 (41.7)                           | 5 (55.6)                           | 23 (51.1)                         |
| <b>Female</b>                     | 5 (41.7)                          | 6 (50.0)                          | 7 (58.3)                           | 4 (44.4)                           | 22 (48.9)                         |
| <b>Race</b>                       |                                   |                                   |                                    |                                    |                                   |
| <b>White</b>                      | 8 (66.7)                          | 10 (83.3)                         | 11 (91.7)                          | 8 (88.9)                           | 37 (82.2)                         |
| <b>Black or African American</b>  | 1 (8.3)                           | 0                                 | 0                                  | 0                                  | 1 (2.2)                           |
| <b>Asian</b>                      | 3 (25.0)                          | 2 (16.7)                          | 1 (8.3)                            | 1 (11.1)                           | 7 (15.6)                          |
| <b>Ethnicity</b>                  |                                   |                                   |                                    |                                    |                                   |
| <b>Hispanic/Latino</b>            | 1 (8.3)                           | 1 (8.3)                           | 0                                  | 0                                  | 2 (4.4)                           |
| <b>Non-Hispanic/non-Latino</b>    | 11 (91.7)                         | 10 (83.3)                         | 12 (100.0)                         | 9 (100.0)                          | 42 (93.3)                         |
| <b>Not reported</b>               | 0                                 | 1 (8.3)                           | 0                                  | 0                                  | 1 (2.2)                           |
| <b>Age at vaccination (years)</b> |                                   |                                   |                                    |                                    |                                   |
| <b>Mean (SD)</b>                  | 29.4 (6.39)                       | 35.8 (9.96)                       | 38.3 (9.34)                        | 39.0 (11.16)                       | 35.4 (9.71)                       |
| <b>Median</b>                     | 26.5                              | 33.5                              | 38.0                               | 41.0                               | 33.0                              |
| <b>Min, max</b>                   | (24, 42)                          | (23, 52)                          | (25, 53)                           | (19, 54)                           | (19, 54)                          |

**Extended Data Table 1 | Demographic Characteristics.** N = number of subjects in the specified group, or the total sample. This value is the denominator for the percentage calculations. n = Number of subjects with the specified characteristic.

|                                                | <b>10 µg<br/>(N=12)</b> | <b>30 µg<br/>(N=12)</b> | <b>100 µg<br/>(N=12)</b> | <b>Placebo<br/>(N=9)</b> |
|------------------------------------------------|-------------------------|-------------------------|--------------------------|--------------------------|
| <b>Adverse Event</b>                           | <b>n (%)</b>            | <b>n (%)</b>            | <b>n (%)</b>             | <b>n (%)</b>             |
| <b>Any event</b>                               | 6 (50.0)                | 6 (50.0)                | 7 (58.3)                 | 1 (11.1)                 |
| <b>Related</b>                                 | 3 (25.0)                | 6 (50.0)                | 6 (50.0)                 | 1 (11.1)                 |
| <b>Severe</b>                                  | 0                       | 1 (8.3)                 | 1 (8.3)                  | 0                        |
| <b>Life-threatening</b>                        | 0                       | 0                       | 0                        | 0                        |
| <b>Any serious adverse event</b>               | 0                       | 0                       | 0                        | 0                        |
| <b>Related</b>                                 | 0                       | 0                       | 0                        | 0                        |
| <b>Severe</b>                                  | 0                       | 0                       | 0                        | 0                        |
| <b>Life-threatening</b>                        | 0                       | 0                       | 0                        | 0                        |
| <b>Any adverse event leading to withdrawal</b> | 0                       | 0                       | 0                        | 0                        |
| <b>Related</b>                                 | 0                       | 0                       | 0                        | 0                        |
| <b>Severe</b>                                  | 0                       | 0                       | 0                        | 0                        |
| <b>Life-threatening</b>                        | 0                       | 0                       | 0                        | 0                        |
| <b>Death</b>                                   | 0                       | 0                       | 0                        | 0                        |

**Extended Data Table 2 | Adverse Events.** N: number of subjects in the specified group or the total sample. This value is the denominator for the percentage calculations. n: number of subjects reporting at least 1 occurrence of the specified adverse event category. For "any event", n: the number of subjects reporting at least 1 occurrence of any adverse event; Related: Assessed by the investigator as related to investigational product.
